# Supplementary material
Source: HighWire-hosted journal article supplement (doi:10.1101/rna.079583.123)
Supplement: Supplemental_Material.docx [file Supplemental_Material.docx]

**Anionic G•U pairs in bacterial ribosomal rRNAs**

Eric Westhof1*, Zoe L. Watson2, Craig L. Zirbel3, Jamie H. D. Cate2,4,5,6

*1Architecture et Réactivité de l’ARN, Université de Strasbourg, Institut de biologie moléculaire et cellulaire du CNRS, 15 rue René Descartes, F-67084 Strasbourg, France.*

*2Department of Chemistry, University of California, Berkeley, CA 94720, USA.*

*3Department of Mathematics and Statistics, Bowling Green State University, Bowling Green, OH 43403, USA.*

*4Department of Molecular and Cell Biology, University of California, Berkeley, CA 94720, USA.*

*5Molecular Biophysics and Integrated Bioimaging Division, Lawrence Berkeley National Laboratory, Berkeley, CA 94720, USA.*

*6Innovative Genomics Institute, University of California, Berkeley, CA 94720, USA.*

* Corresponding author: e.westhof@ibmc-cnrs.unistra.fr

Keywords: G•U pair, rRNA, anticodon, codon, tRNA, mRNA, anionic.

Short title: Anionic G•Upairs

Conflict of interest: None

Contributions of authors: EW, ZW, CZ, JC participated in the research and contributed to the writing of the paper.

SUPPLEMENTARY MATERIAL

**Figure S1:** The local environment of the U34*•G3 base pair in the A site of the ribosome (PDB 5E81, (Rozov et al. 2016)). Only G3 forms tight contacts via a potassium ion to the small subunit.

**FIGURE S2:** (A) The environment of the G664•G741 pair in the E. coli ribosome (Watson et al. 2020): G666 stacks on G741 with one of its anionic oxygen atom making H-bonds to the O2’ of G664 and to N2(G725), while its O4’ in close contact to the O2’(C726), itself engaged in a H-bond with N2(G664). The O2’(G725) also forms a H-bond to O2’(G664). (B)The G664•G741 pair as present in the 2.6 Å resolution complex of S15 with its rRNA fragment with contacts to two nearby nucleotides G725 and C726 (PDB: 1G1X, (Agalarov et al. 2000)).

**Figure S3:** The local environment of the G3•U70 base pair in the structure of the complex between tRNA_Ala and its cognate aminoacyl tRNA synthetase (PDB 3WQY, (Naganuma et al. 2014).

**Figure S4:** The anionic G76•U65 pair binds in the major groove a hydration water from a hydrated Mg ion and is stacked between a G=C pair and a one H-bond C• A pair (PDB 2QBZ, (Dann et al. 2007)).

**References**

Agalarov SC, Sridhar Prasad G, Funke PM, Stout CD, Williamson JR. 2000. Structure of the S15,S6,S18-rRNA complex: assembly of the 30S ribosome central domain. *Science* **288**: 107-113.

Dann CE, 3rd, Wakeman CA, Sieling CL, Baker SC, Irnov I, Winkler WC. 2007. Structure and mechanism of a metal-sensing regulatory RNA. *Cell* **130**: 878-892.

Naganuma M, Sekine S, Chong YE, Guo M, Yang XL, Gamper H, Hou YM, Schimmel P, Yokoyama S. 2014. The selective tRNA aminoacylation mechanism based on a single G*U pair. *Nature* **510**: 507-511.

Rozov A, Demeshkina N, Khusainov I, Westhof E, Yusupov M, Yusupova G. 2016. Novel base-pairing interactions at the tRNA wobble position crucial for accurate reading of the genetic code. *Nat Commun* **7**: 10457.

Watson ZL, Ward FR, Meheust R, Ad O, Schepartz A, Banfield JF, Cate JH. 2020. Structure of the bacterial ribosome at 2 A resolution. *Elife* **9**.
